# Supplementary material for: Decoding the Structural Keywords in Protein Structure Universe
Source: Springer Nature journal article supplement (doi:10.1007/s11390-019-1895-y), 2019-01-01
Supplement: 11390_2019_1895_MOESM1_ESM.pdf [file 11390_2019_1895_MOESM1_ESM.pdf]

# **Decoding the Structural Keywords in Protein Structure Universe**

**Wessam Elhefnawy, Min Li, Jianxin Wang, and Yaohang Li**

Elhefnawy W, Li M, Wang JX et al. Decoding the structural keywords in protein structure universe. JOURNAL OF COMPUTER SCIENCE AND TECHNOLOGY 34(1): 3–15 Jan. 2019. DOI 10.1007/s11390-019-1895-y

# Frag-K

- a protein structural dictionary
- composed of a set of backbone fragments ranging from 4 to 20 residues
- effectively distinguish between major protein folds
- ~400 4- to 20-residue Frag-K fragments is capable of classifying major SCOP folds with high accuracy

# Generation of Frag-K Library

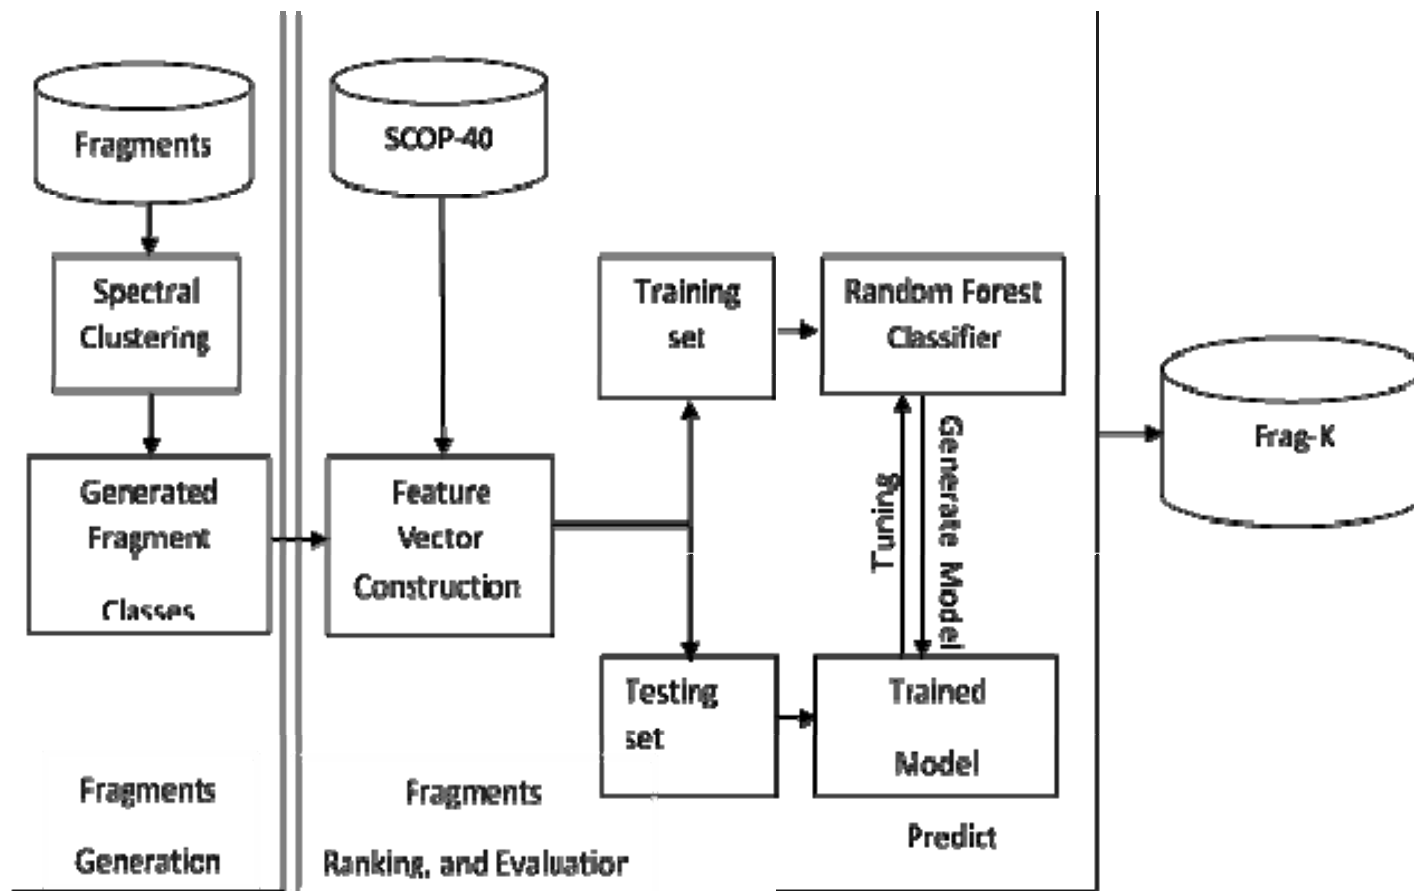

# Frag-K outperforms Fragbag with better precision, recall, and F-measure in classifying protein folds in EDD dataset

|                   | Fragbag     |             |             | Frag-K      |             |             |             |             |             |
|-------------------|-------------|-------------|-------------|-------------|-------------|-------------|-------------|-------------|-------------|
|                   | L4 to L12   |             |             | L4 to L12   |             |             | L4 to L20   |             |             |
| SCOP Fold Classes | Precision   | Recall      | F           | Precision   | Recall      | F           | Precision   | Recall      | F           |
| a.39              | 1.00        | 0.60        | 0.75        | 1.00        | 0.67        | 0.80        | 1.00        | 0.87        | 0.93        |
| c.23              | 0.90        | 0.69        | 0.78        | 0.78        | 0.90        | 0.84        | 0.85        | 0.96        | 0.90        |
| c.47              | 0.79        | 0.65        | 0.71        | 0.95        | 0.91        | 0.93        | 0.95        | 0.89        | 0.92        |
| c.69              | 0.89        | 0.74        | 0.81        | 1.00        | 0.96        | 0.98        | 1.00        | 1.00        | 1.00        |
| a.1               | 0.80        | 0.80        | 0.80        | 0.90        | 0.90        | 0.90        | 1.00        | 0.90        | 0.95        |
| a.3               | 1.00        | 0.14        | 0.25        | 0.71        | 0.71        | 0.71        | 0.88        | 1.00        | 0.93        |
| c.2               | 0.75        | 0.78        | 0.76        | 0.98        | 0.95        | 0.96        | 1.00        | 0.98        | 0.99        |
| c.3               | 1.00        | 0.32        | 0.48        | 1.00        | 0.82        | 0.90        | 1.00        | 0.95        | 0.98        |
| c.1               | 0.66        | 0.94        | 0.78        | 0.85        | 0.96        | 0.90        | 0.98        | 0.96        | 0.97        |
| b.1               | 0.64        | 0.80        | 0.71        | 0.90        | 0.94        | 0.92        | 0.93        | 0.98        | 0.95        |
| b.6               | 0.25        | 0.12        | 0.17        | 0.38        | 0.38        | 0.38        | 1.00        | 0.63        | 0.77        |
| b.40              | 0.84        | 0.36        | 0.50        | 0.78        | 0.80        | 0.79        | 0.93        | 0.84        | 0.88        |
| b.42              | 0.40        | 0.18        | 0.25        | 1.00        | 0.82        | 0.90        | 1.00        | 1.00        | 1.00        |
| c.93              | 1.00        | 0.56        | 0.71        | 0.92        | 0.67        | 0.77        | 1.00        | 1.00        | 1.00        |
| b.47              | 1.00        | 0.89        | 0.94        | 0.80        | 0.89        | 0.84        | 1.00        | 0.89        | 0.94        |
| b.60              | 1.00        | 0.62        | 0.77        | 1.00        | 0.75        | 0.86        | 1.00        | 0.75        | 0.86        |
| c.37              | 0.86        | 0.52        | 0.65        | 1.00        | 0.80        | 0.89        | 0.95        | 0.90        | 0.92        |
| b.29              | 0.83        | 0.36        | 0.50        | 1.00        | 0.71        | 0.83        | 1.00        | 0.93        | 0.96        |
| g.3               | 0.39        | 0.64        | 0.48        | 0.96        | 0.92        | 0.94        | 0.91        | 0.84        | 0.87        |
| a.26              | 0.33        | 0.12        | 0.18        | 0.63        | 0.63        | 0.63        | 0.75        | 0.75        | 0.75        |
| a.24              | 0.73        | 0.53        | 0.62        | 0.89        | 0.53        | 0.67        | 0.83        | 0.67        | 0.74        |
| c.55              | 0.67        | 0.19        | 0.30        | 0.39        | 0.67        | 0.49        | 0.61        | 0.90        | 0.73        |
| d.15              | 0.56        | 0.70        | 0.62        | 0.88        | 0.81        | 0.85        | 0.93        | 0.93        | 0.93        |
| a.4               | 0.56        | 0.93        | 0.70        | 0.82        | 0.97        | 0.89        | 0.89        | 0.99        | 0.93        |
| d.58              | 0.61        | 0.79        | 0.69        | 0.76        | 0.76        | 0.76        | 0.84        | 0.84        | 0.84        |
| b.121             | 0.75        | 0.55        | 0.63        | 0.80        | 0.73        | 0.76        | 1.00        | 0.91        | 0.95        |
| b.34              | 0.62        | 0.49        | 0.55        | 0.90        | 0.70        | 0.79        | 0.86        | 0.81        | 0.83        |
| <b>Avg/total</b>  | <b>0.73</b> | <b>0.56</b> | <b>0.60</b> | <b>0.85</b> | <b>0.79</b> | <b>0.81</b> | <b>0.93</b> | <b>0.89</b> | <b>0.90</b> |

# Top-200 most effective Fold-Keys fragments for fold classification

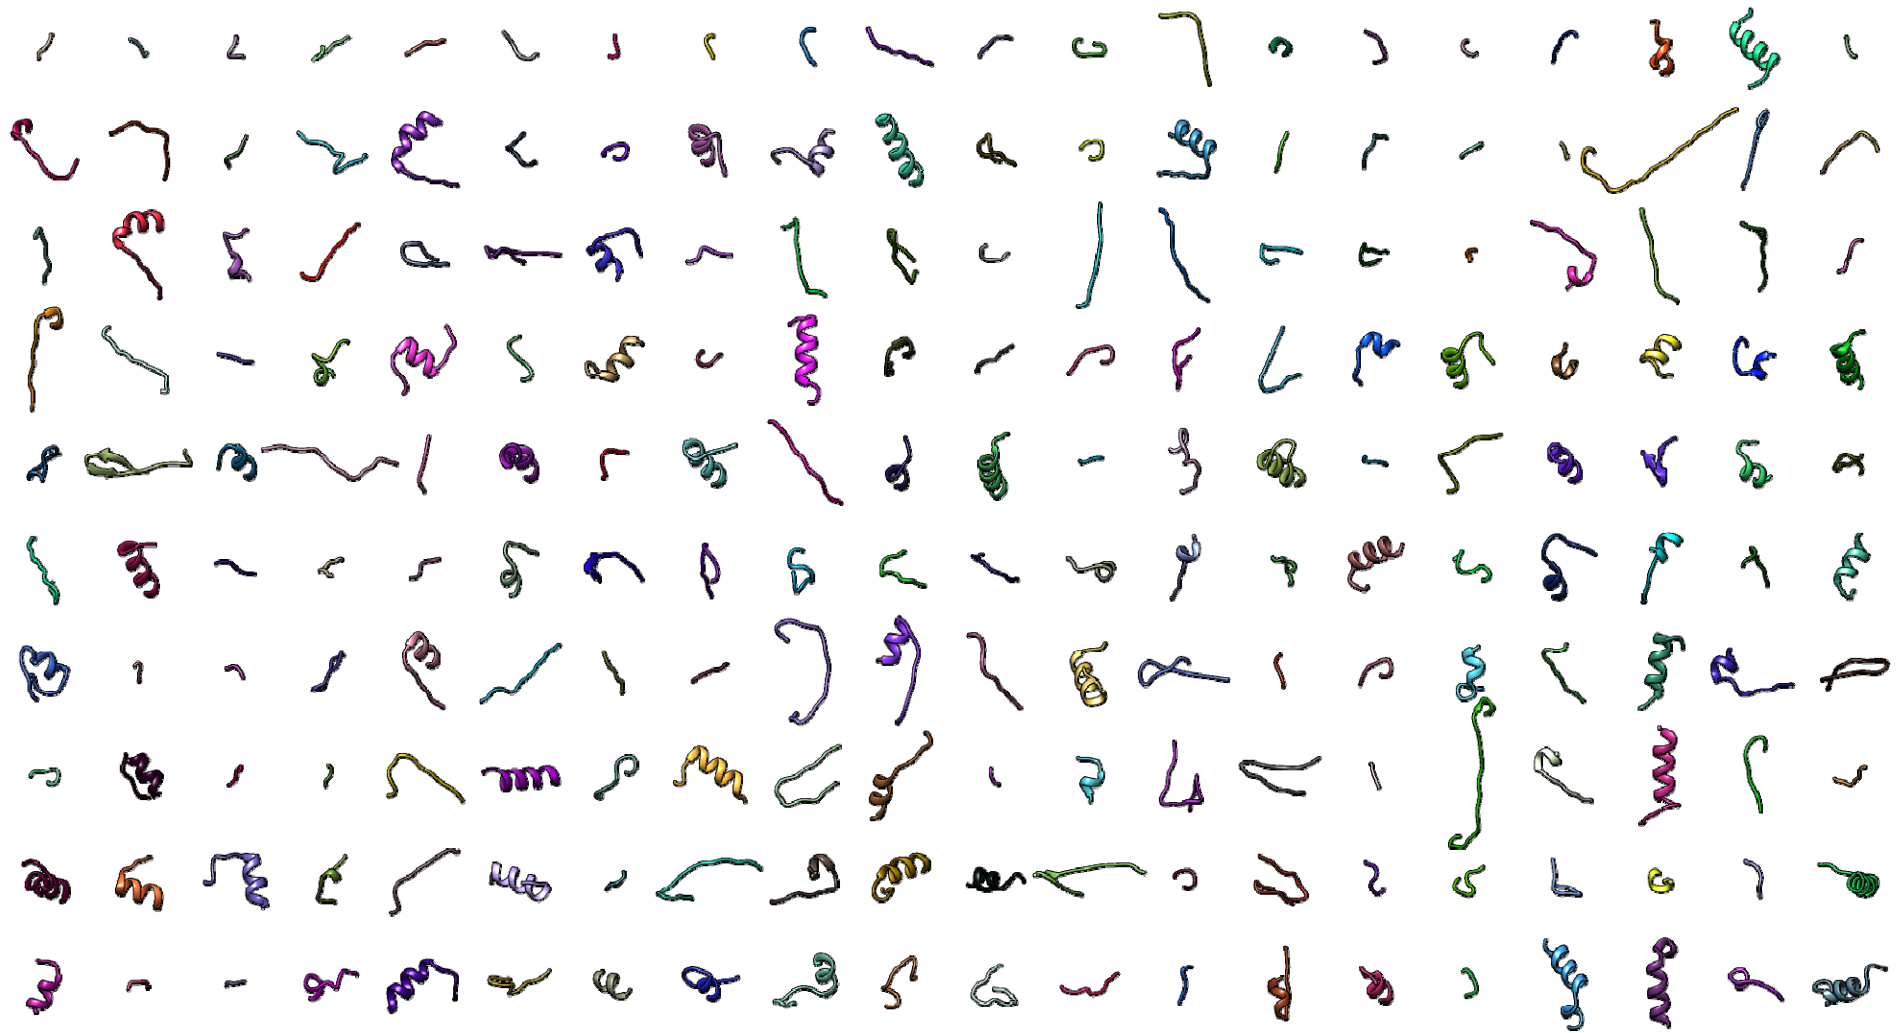

# Frag-K to assemble protein structures with global fit

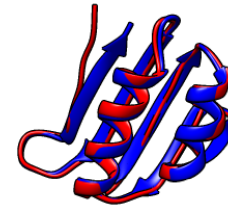

d4maka\_d.58: Ferredoxin-like  
*alpha+beta sandwich with antiparallel beta-sheet;*  
*(beta-alpha-beta), 0.51Å.*

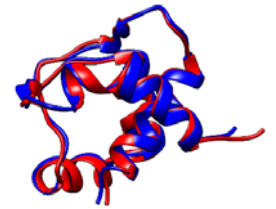

d4j20a\_a.3: Cytochrome  
*core: 3 helices; folded leaf, opened, 0.64Å.*

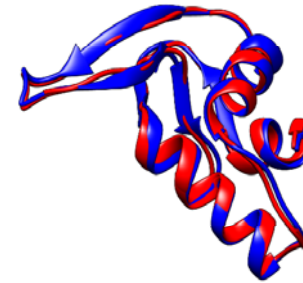

d1dp7p\_a.4: DNA/RNA-binding 3-helical bundle  
*core: 3-helices; bundle, closed or partly opened, right-*  
*handed twist; up-and down, 1.41Å.*

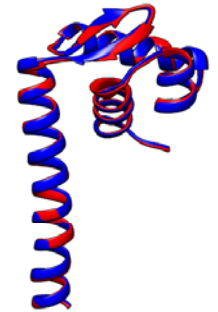

d1r7ja\_a.4: DNA/RNA-binding 3-helical bundle  
*core: 3-helices; bundle, closed or partly opened,*  
*right-handed twist; up-and down, 1.27Å*

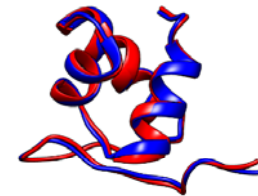

d2ve8a\_a.4: DNA/RNA-binding 3-helical bundle  
*core: 3-helices; bundle, closed or partly opened, right-*  
*handed twist; up-and down, 0.40Å.*

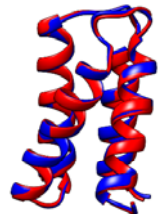

d1l1a1\_a.24: Four-helical up-and-down bundle  
*core: 4 helices; bundle, closed or partly opened,*  
*handed twist; up-and-down, 0.39Å.*

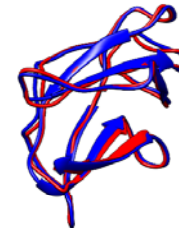

d3uzqb\_b.1: Immunoglobulin-like beta-sandwich  
*sandwich; 7 strands in 2 sheets; Greek-key, 1.78Å*

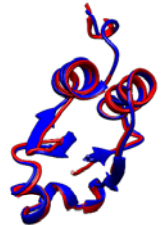

d3eina1\_c.47: Thioredoxin fold  
*core: 3 layers, a*  
*mixed beta-sheet of 4 strands, order 4312; strand*  
*antiparallel to the rest, 0.65Å.*
